# Supplementary material
Source: publisher site journal article supplement (https://www.spandidos-publications.com/1662/downloadSupplementary)
Supplement: Supplementary file 1 [file downloadSupplementary]

## Appendix S1

*Buffer system optimization.* The reaction buffer used was based on a previous study of duplex-crossed allele-specific-PCR from our group (28), in which TPMT\*3B and \*3C were identified successfully using a Platinum® Quantitative PCR Supermix-UDG (Applied Biosystems; Thermo Fisher Scientific, Inc.) and their corresponding primers and plasmids. When Platinum® Quantitative PCR Supermix-UDG was used as a premix in the system, no amplification curves were observed in a TPMT\*3B wild-type (WT), mutant (MT) or mixed plasmid reaction system (Fig. S5A) and the same result was obtained from TPMT\*3C (Fig. S5B). This indicated that the Platinum® Quantitative PCR Supermix-UDG was not suitable for TPMT\*3B or TPMT\*3C detection. In order to explore the effects of the reaction agents on the amplification curves, two other reagents were used for the reaction system. One was Premix Ex Taq™ (Probe qPCR; Takara Biotechnology Co., Ltd.), which was used in genotyping of TPMT\*2 with CRAS-PCR (19), whereas the other was Premix Ex Taq™ Hot Start (Takara Biotechnology Co., Ltd.). As expected, amplification curves appeared in the Premix Ex Taq™ reagent system, but non-specific amplification also occurred. However, genotypes could still be determined based on the results of amplification curves. Subsequently, Premix Ex Taq™ Hot Start was used to investigate non-specific amplification in the system. In the system containing WT primers, WT, MT or mixed plasmids were added, but no amplification was observed (Fig. S6A-D). In the system containing MT primers, WT, MT or mixed plasmids were added; while the WT plasmid had no amplification, the MT and mixed plasmids had good amplification but no specific amplification (Fig. S6B-E).

In the MIX system containing WT and MT primers, WT, MT or mixed plasmids were added, but there was no amplification (Fig. S6C-F). Therefore, gene polymorphisms could not be distinguished from a single reaction tube. To ensure implementation of the experiment, Premix Ex Taq™ (Probe qPCR) was used as the system premix reagent.

In this experiment, three master mixes [1X Platinum® Quantitative PCR Supermix-UDG; 1X Premix Ex Taq™ Hot Start Version and Premix Ex Taq™ (Probe qPCR)] were used for preparation of the reaction system. Distinct experimental results were obtained for the three premix reagents. With 1X Platinum® Quantitative PCR Supermix-UDG, there were no amplification curves that appeared in the reaction system. It was hypothesized that this was because Supermix-UDG can selectively cleave the glycosidic bond of the dU-base, and the Supermix-UDG might not inactivate completely; thus, it was recommended to add uracil glycosylase inhibitors to prevent degradation of the amplification products. In the comparison of Premix Ex Taq™ Hot Start Version with Premix Ex Taq™ (Probe qPCR), the Premix Ex Taq™ (Probe qPCR) contained Tli RNaseH, which is specific for the probe method quantitative PCR (qPCR) reaction. The results revealed that Premix Ex Taq™ (Probe qPCR) had higher amplification efficiency and sensitivity. Non-specific amplification may be due to the thermodynamic driving force of thermophilic DNA polymerase, and a single, base terminal mismatch between the primer and template could easily trigger the non-specific amplification of input DNA with an opposite genotype. With sufficient time and energy, the cause of non-specific amplification could be studied in detail and eliminated from further experiments.

10 20 30 40 50 60 70 80

T T G A C G A T T G T T G A A G T A C C A G A C A T G C A C C A T T G G G G A C G G T G C C A T C T T C T T A A A G A T T T G A T T T T C T C C C A T A A A T G T T T

90 100 110 120 130 140 150 160 170 180

T C T C T T T C T G G T A G G A C A A A T A T T G G C A A A T T T G A C A T G A T T T G G G A T A G A G A C A T T A G T T G C C A T C A A T C A G G T G A T C G C A A A T G G T A A G T A A T T T T

90 200 210 220 230 240 250 260

C T T T T T T T G T T T A G C T G T C T T A A A T T T T T A G A T A T A C T A T A C T T T T T C T G G G T T C T A G A A A A T C A G C T T A G A C T T C T A A

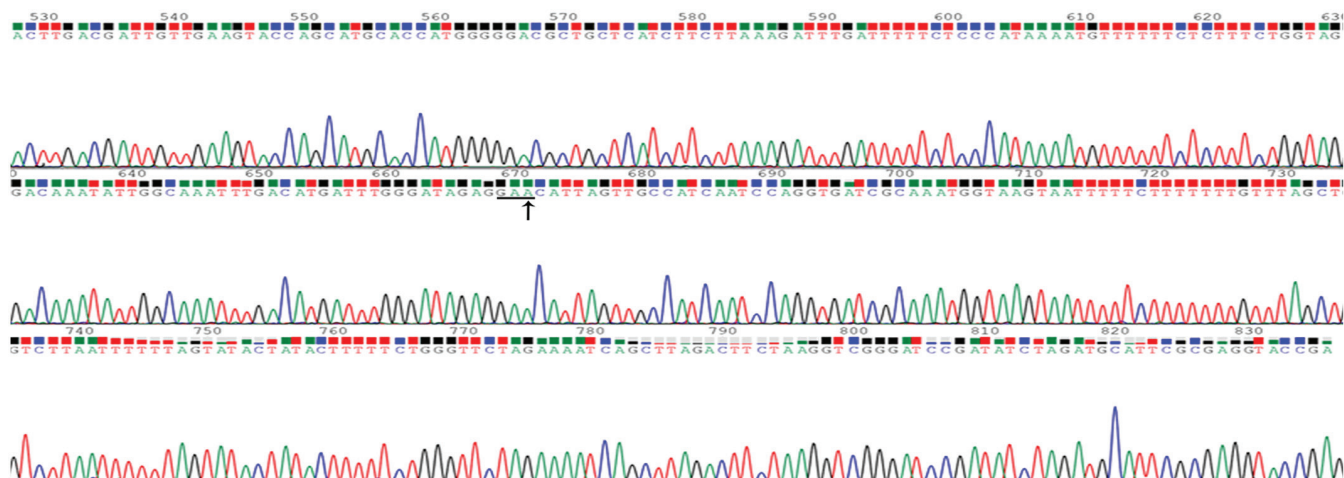

Figure S3. Sequencing chromatograph of wild-type-quality control plasmid for TPMT\*3C. The underlined bases show the codon containing TPMT\*3C, and the arrow indicates the location of TPMT\*3C. TPMT, thiopurine S-methyltransferase.

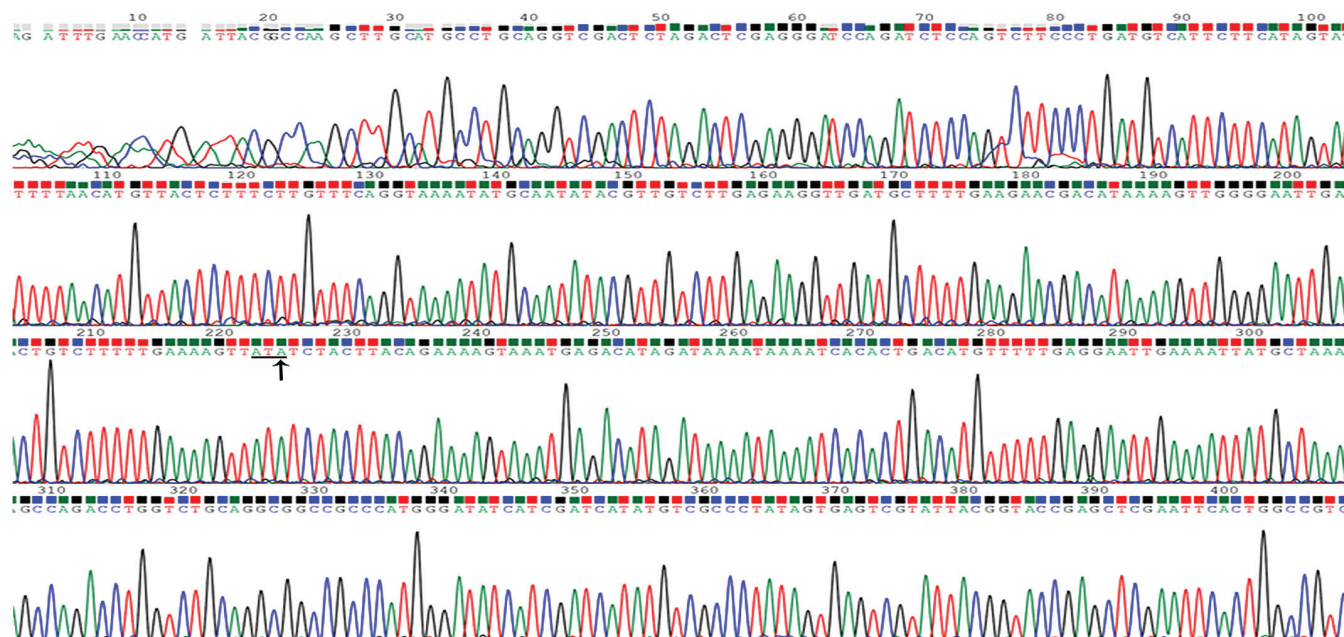

Figure S4. Sequencing chromatograph of mutant-quality control plasmid for TPMT\*3C. The underlined bases show the codon containing TPMT\*3C, and the arrow indicates the location of TPMT\*3C. TPMT, thiopurine S-methyltransferase.

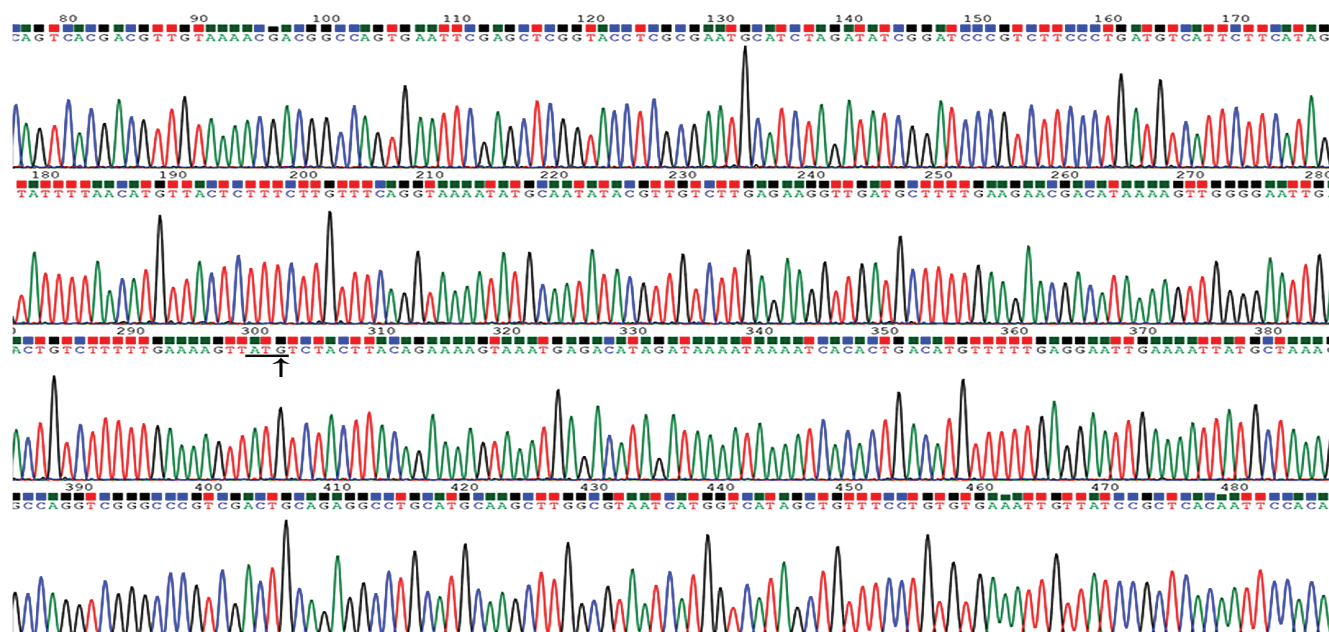

Figure S5. Platinum<sup>®</sup> Quantitative PCR Supermix-UDG was used as a premix for (A) TPMT\*3B and (B) TPMT\*3C. TPMT, thiopurine S-methyltransferase.

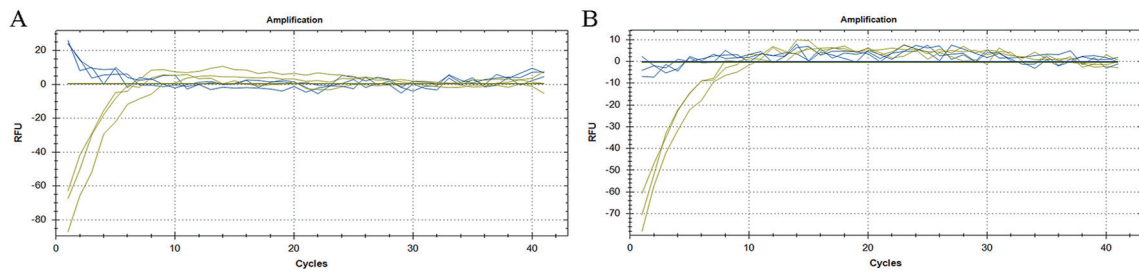



Figure S6. Premix Ex Taq™ Hot Start Version was used as a premix for (A-C) TPMT\*3B and (D-F) TPMT\*3C.

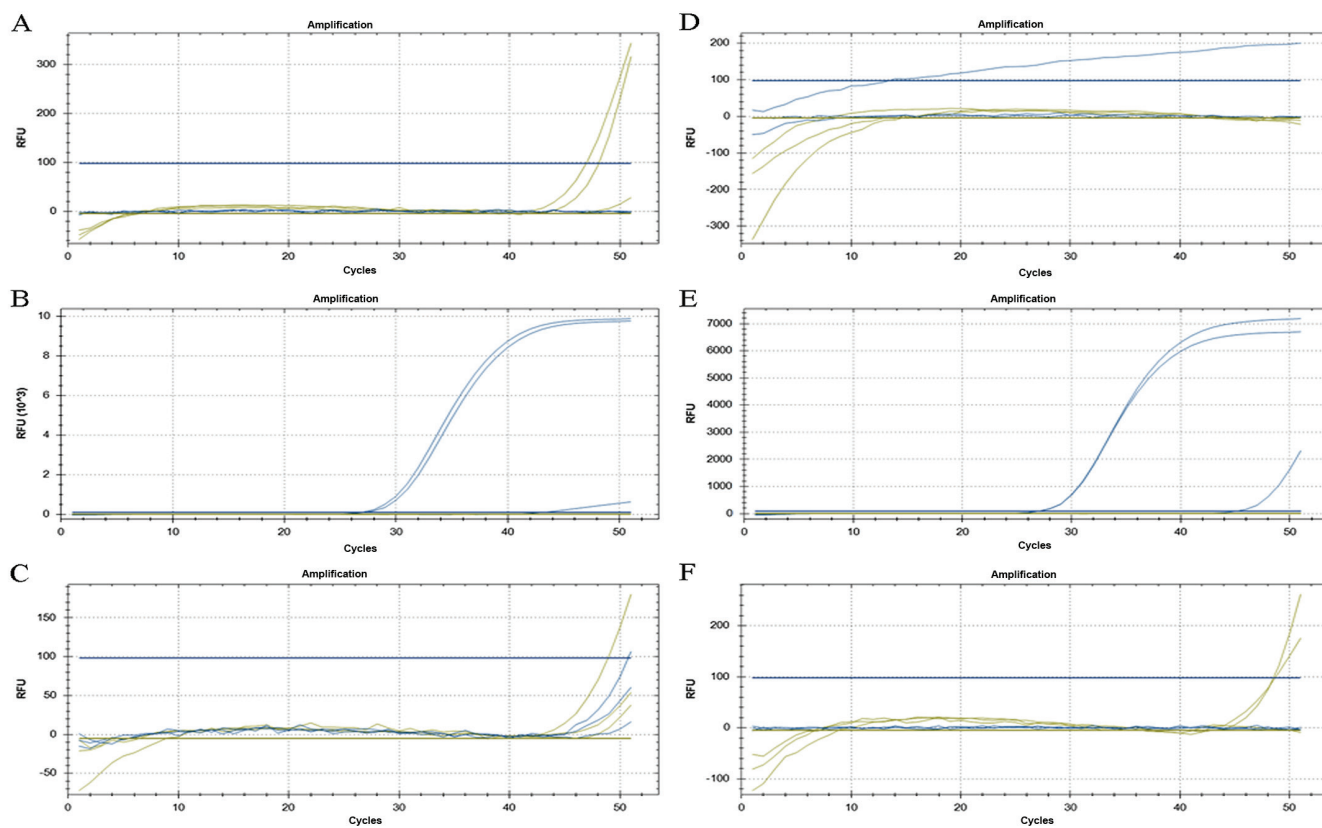

Table SI. Reaction system of TPMT\*3B.

| Reagents              | Final concentration |
|-----------------------|---------------------|
| Premix Ex Taq         | 1X                  |
| HQ-1742 (WT-ASF, VIC) | 300 nM              |
| HQ-1743 (MT-ASF, FAM) | 300 nM              |
| HQ-1608 (COR)         | 600 nM              |
| Template              | N/A                 |
| ddH <sub>2</sub> O    | N/A                 |

For TPMT\*3B, WT-QC, MT-QC or MIX-QC (an equal ratio of WT- and MT-QC plasmids), was used with a total of  $1 \times 10^6$  copies. TPMT, thiopurine S-methyltransferase; WT, wild-type; QC, quality control; MT, mutant; ASF, allele-specific forward; COR, common reverse primer.



Table SII. Reaction system of TPMT\*3C.

| Reagents              | Final concentration |
|-----------------------|---------------------|
| Premix Ex Taq         | 1X                  |
| HQ-1744 (WT-ASR, VIC) | 300 nM              |
| HQ-1745 (MT-ASR, FAM) | 100 nM              |
| HQ-1609 (COF)         | 400 nM              |
| Template              | N/A                 |
| ddH <sub>2</sub> O    | N/A                 |

For TPMT\*3C, WT-QC, MT-QC or MIX-QC (an equal ratio of WT- and MT-QC plasmids) was used with a total of  $1 \times 10^6$  copies. TPMT, thiopurine S-methyltransferase; WT, wild-type; QC, quality control; MT, mutant; ASR, allele-specific reverse; COF, common forward primer.
